# Supplementary material for: Genome-scale model of Rothia mucilaginosa predicts gene essentialities and reveals metabolic capabilities
Source: PubMed Central journal article supplement (PMC11237427; doi:10.1128/spectrum.04006-23), 2024-04-23

**Figure S3: Detailed comparative analysis of gene essentiality in silico predictions using *iRM23NL*.** Comparison of predicted essential genes using four nutrient environments (LB, M9 supplemented with glucose, SCFM, and SNM) under both oxic and anoxic conditions.

# Comparative Analysis - Essential Genes

pFBA

100 FBA runs

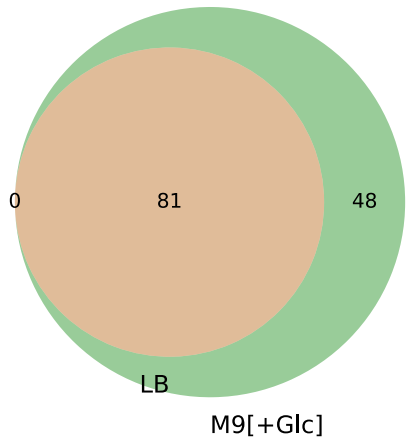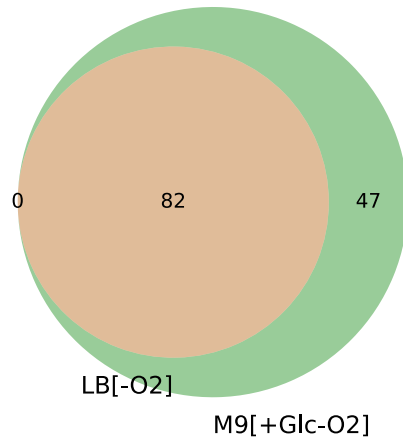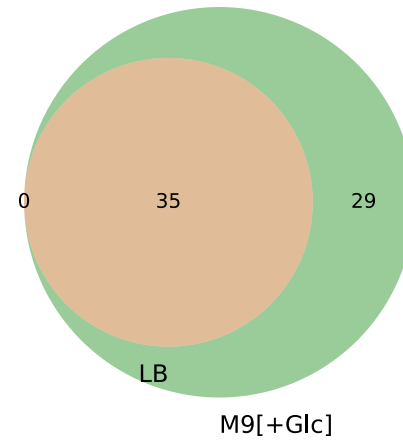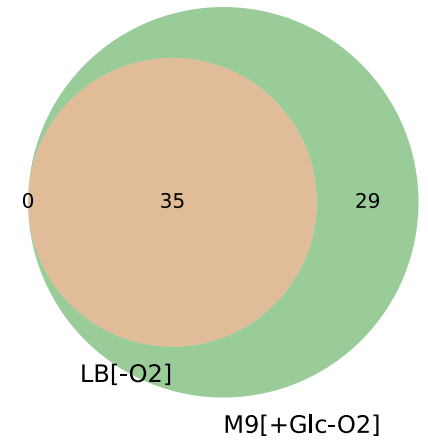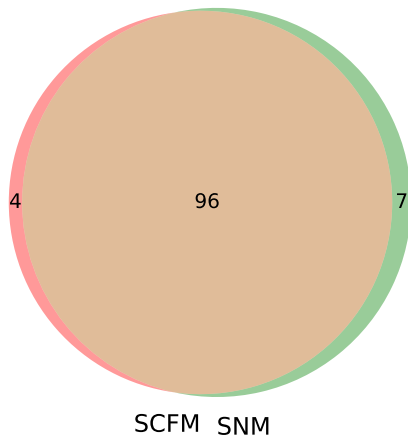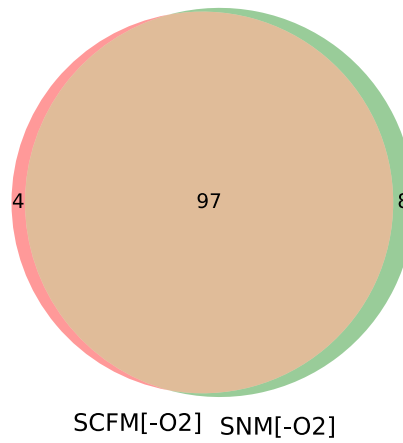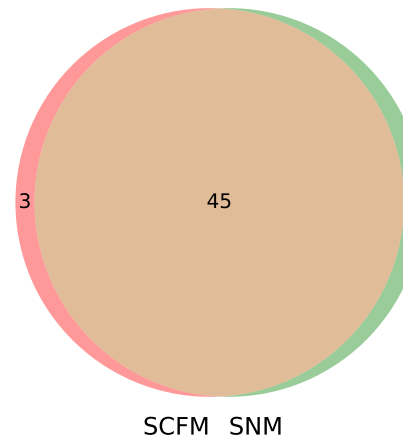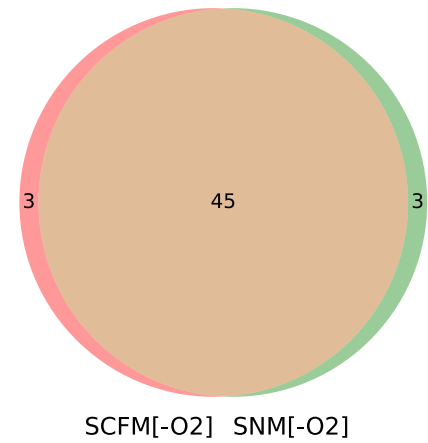

# Comparative Analysis - Essential Genes

## pFBA

Aerobic

Anaerobic

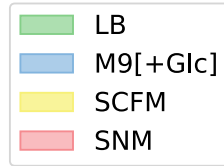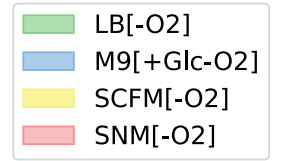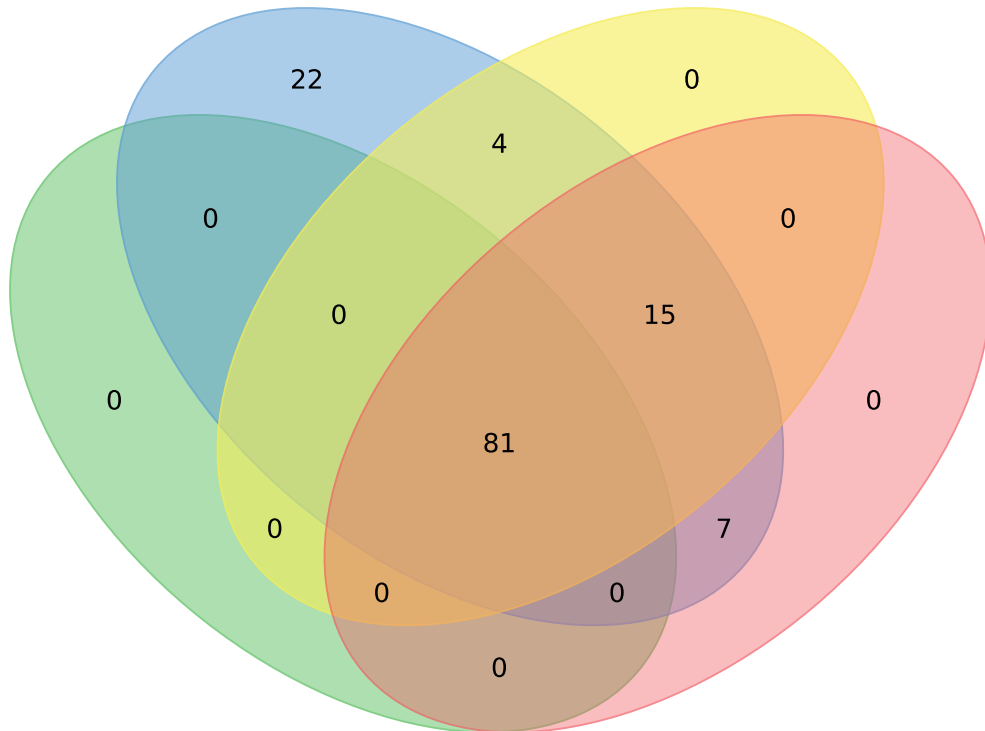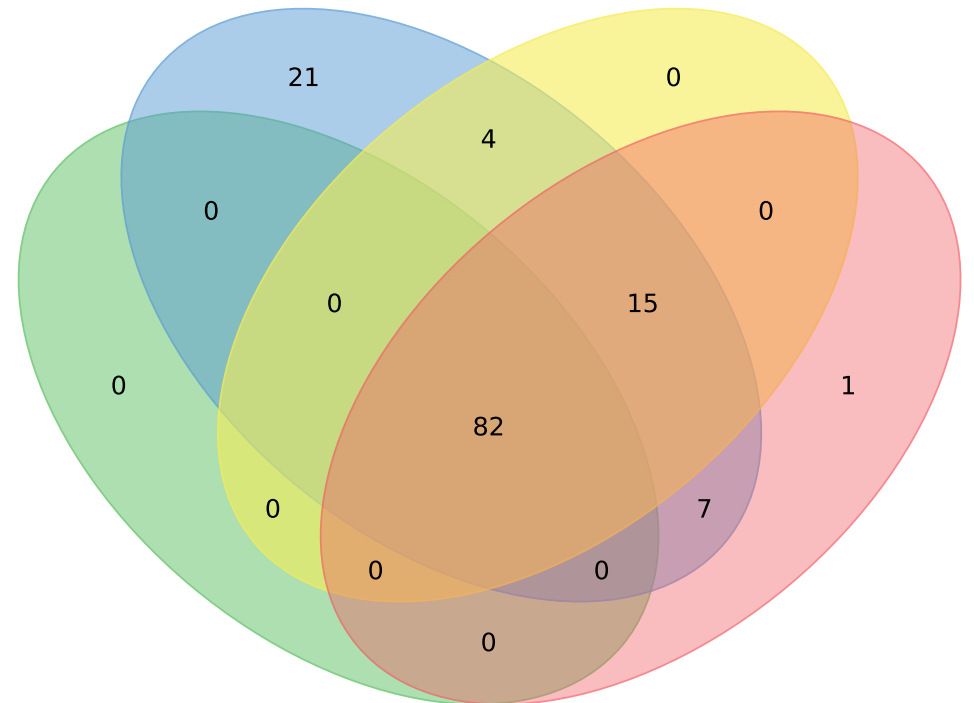

# Comparative Analysis - Essential Genes

## 100 FBA runs

### Aerobic

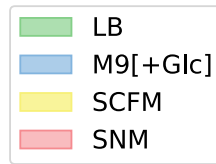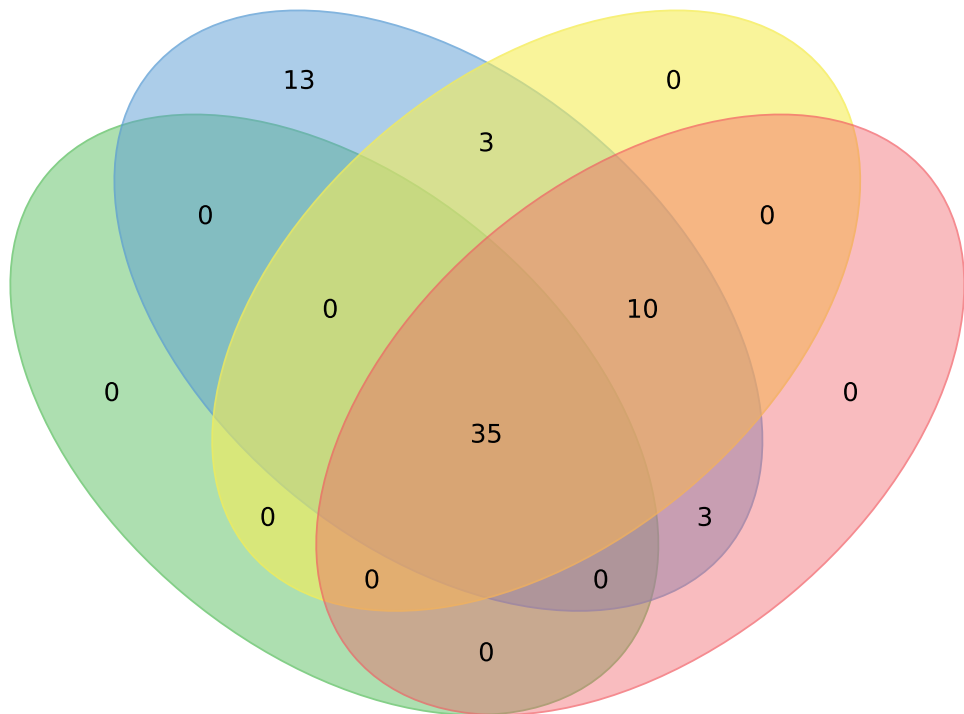

### Anaerobic

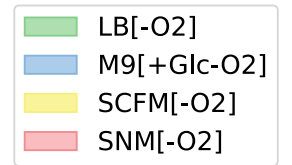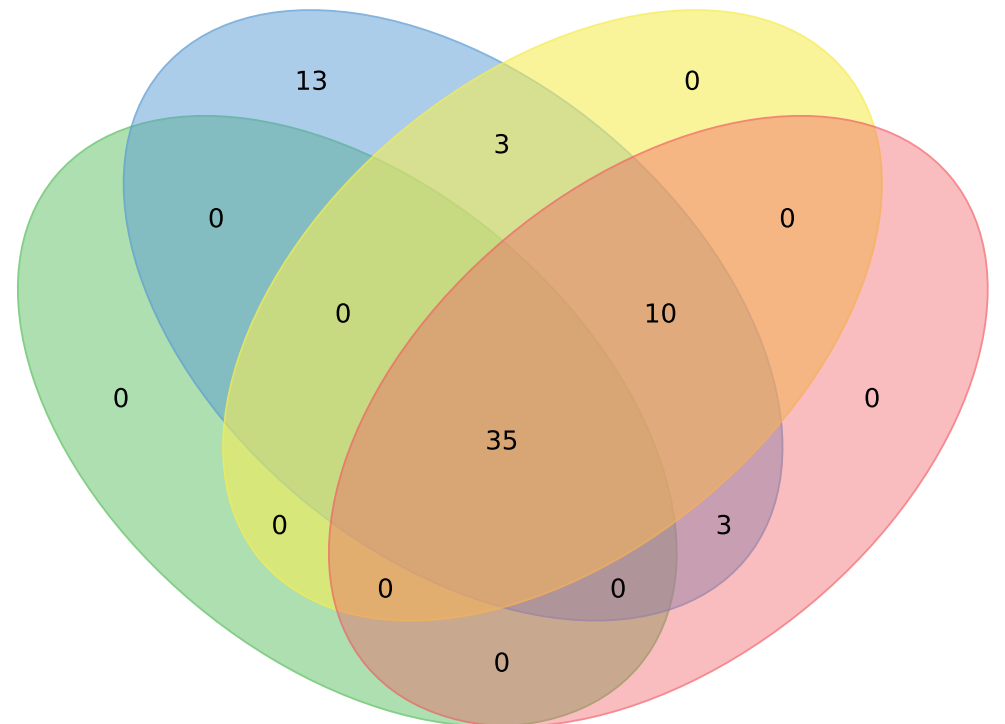

Supplement: spectrum.04006-23-s0003.pdf [file spectrum.04006-23-s0003.pdf]
