# Supplementary material for: Genome-scale model of Rothia mucilaginosa predicts gene essentialities and reveals metabolic capabilities
Source: PubMed Central journal article supplement (PMC11237427; doi:10.1128/spectrum.04006-23), 2024-04-23

**Figure S1: Experimentally-derived catabolic phenome of *R. mucilaginosa* DSM20746.** The OD values were processed and analyzed as described in Materials and Methods. The heatmaps in Figure 5 facilitate the direct association of plate well labels with their corresponding compounds.

PM1

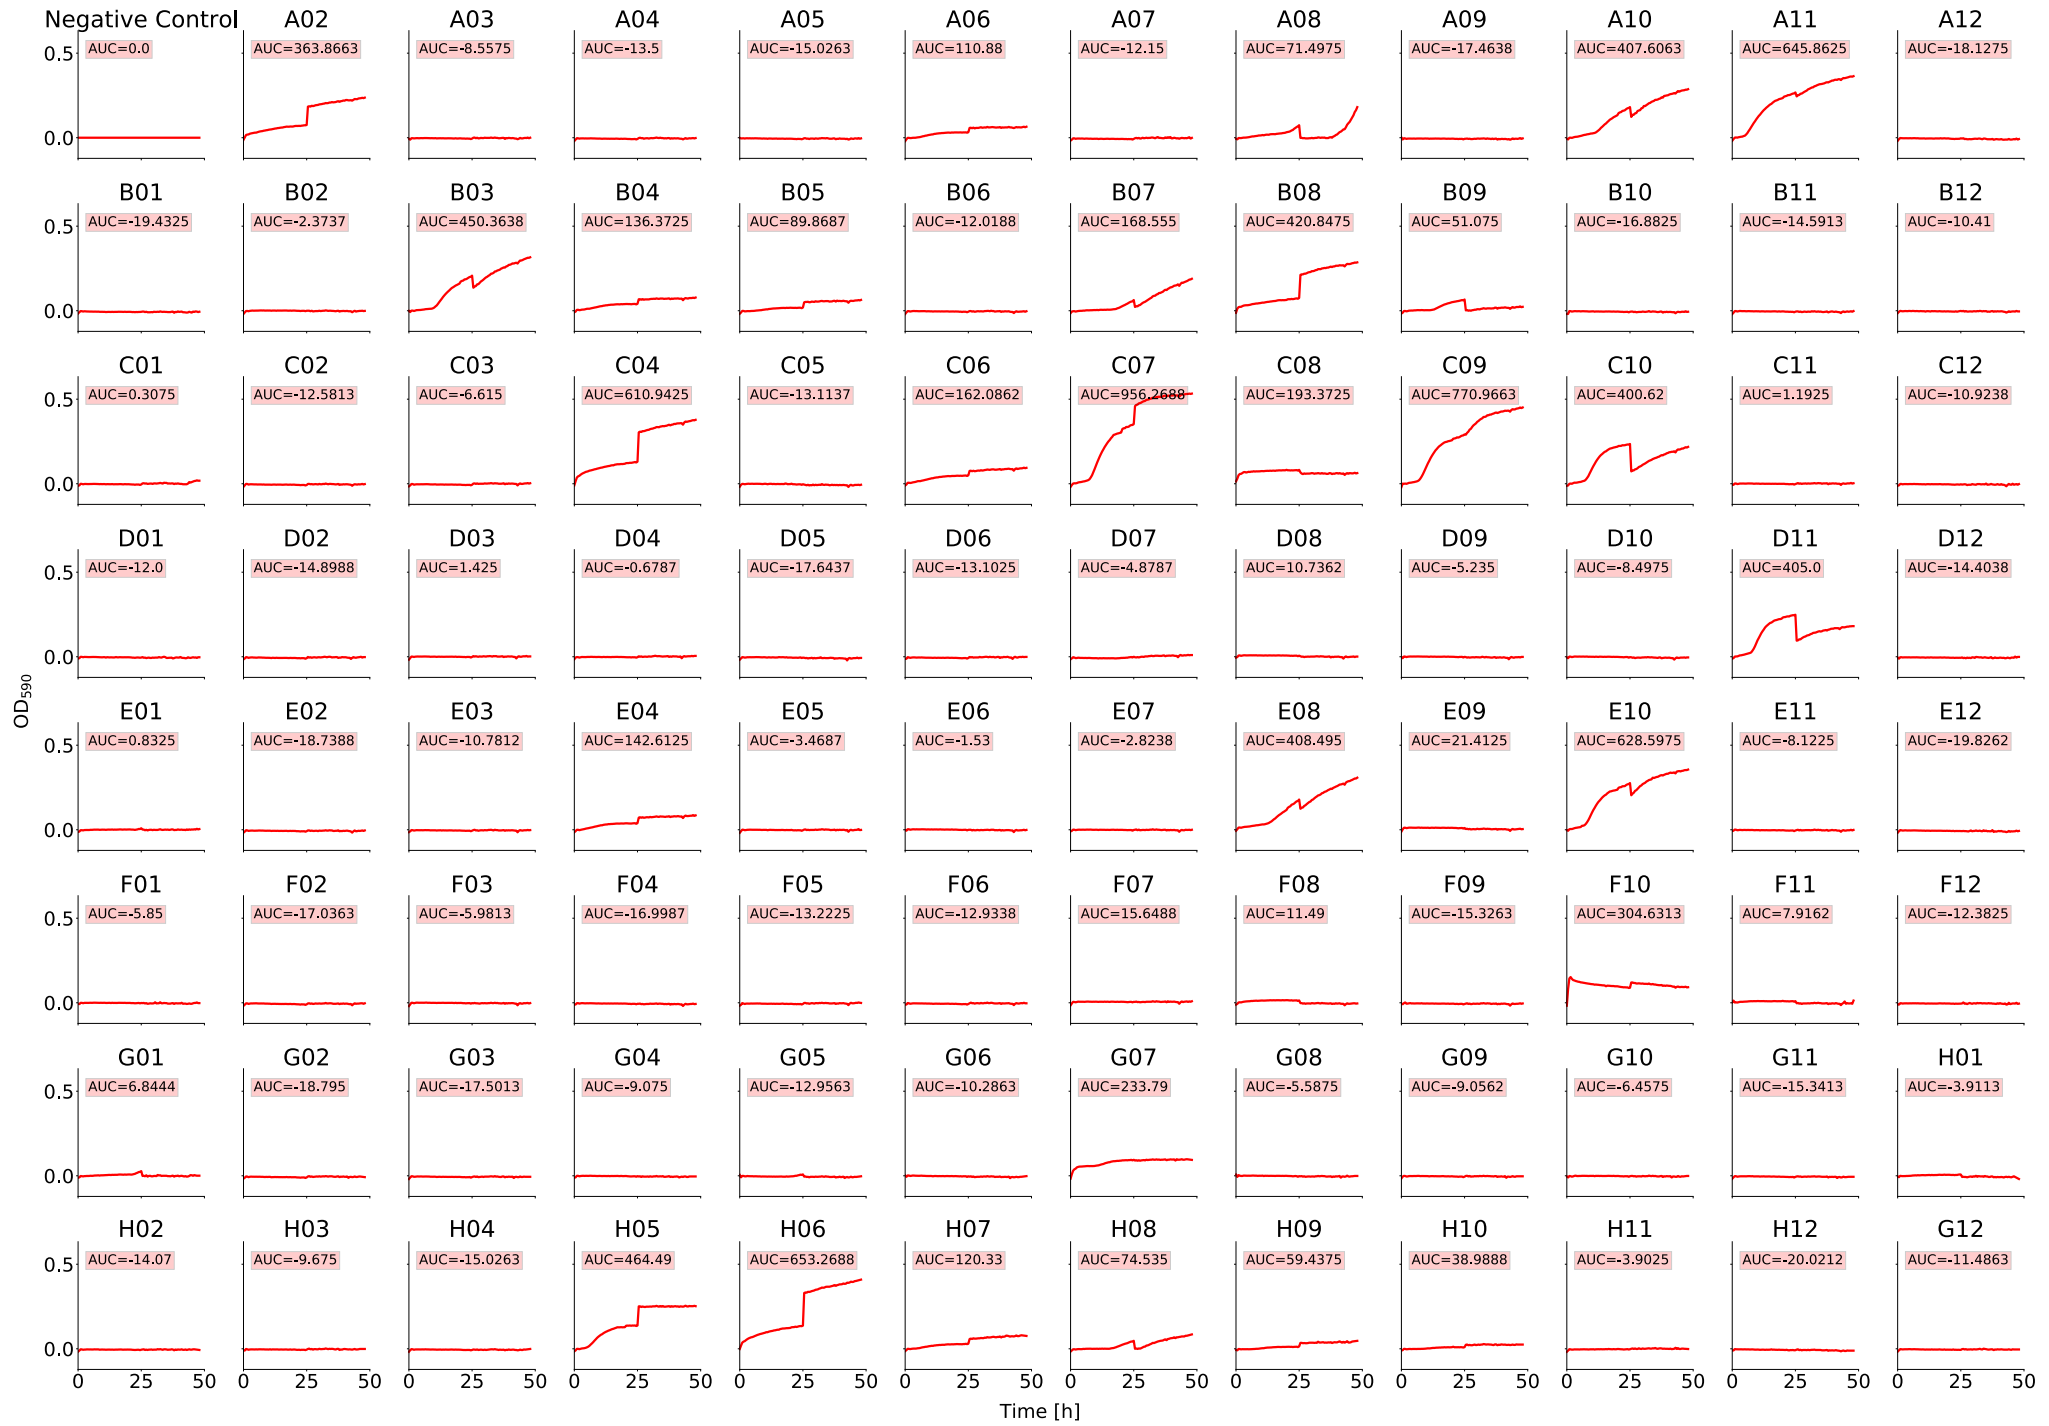

# PM2A

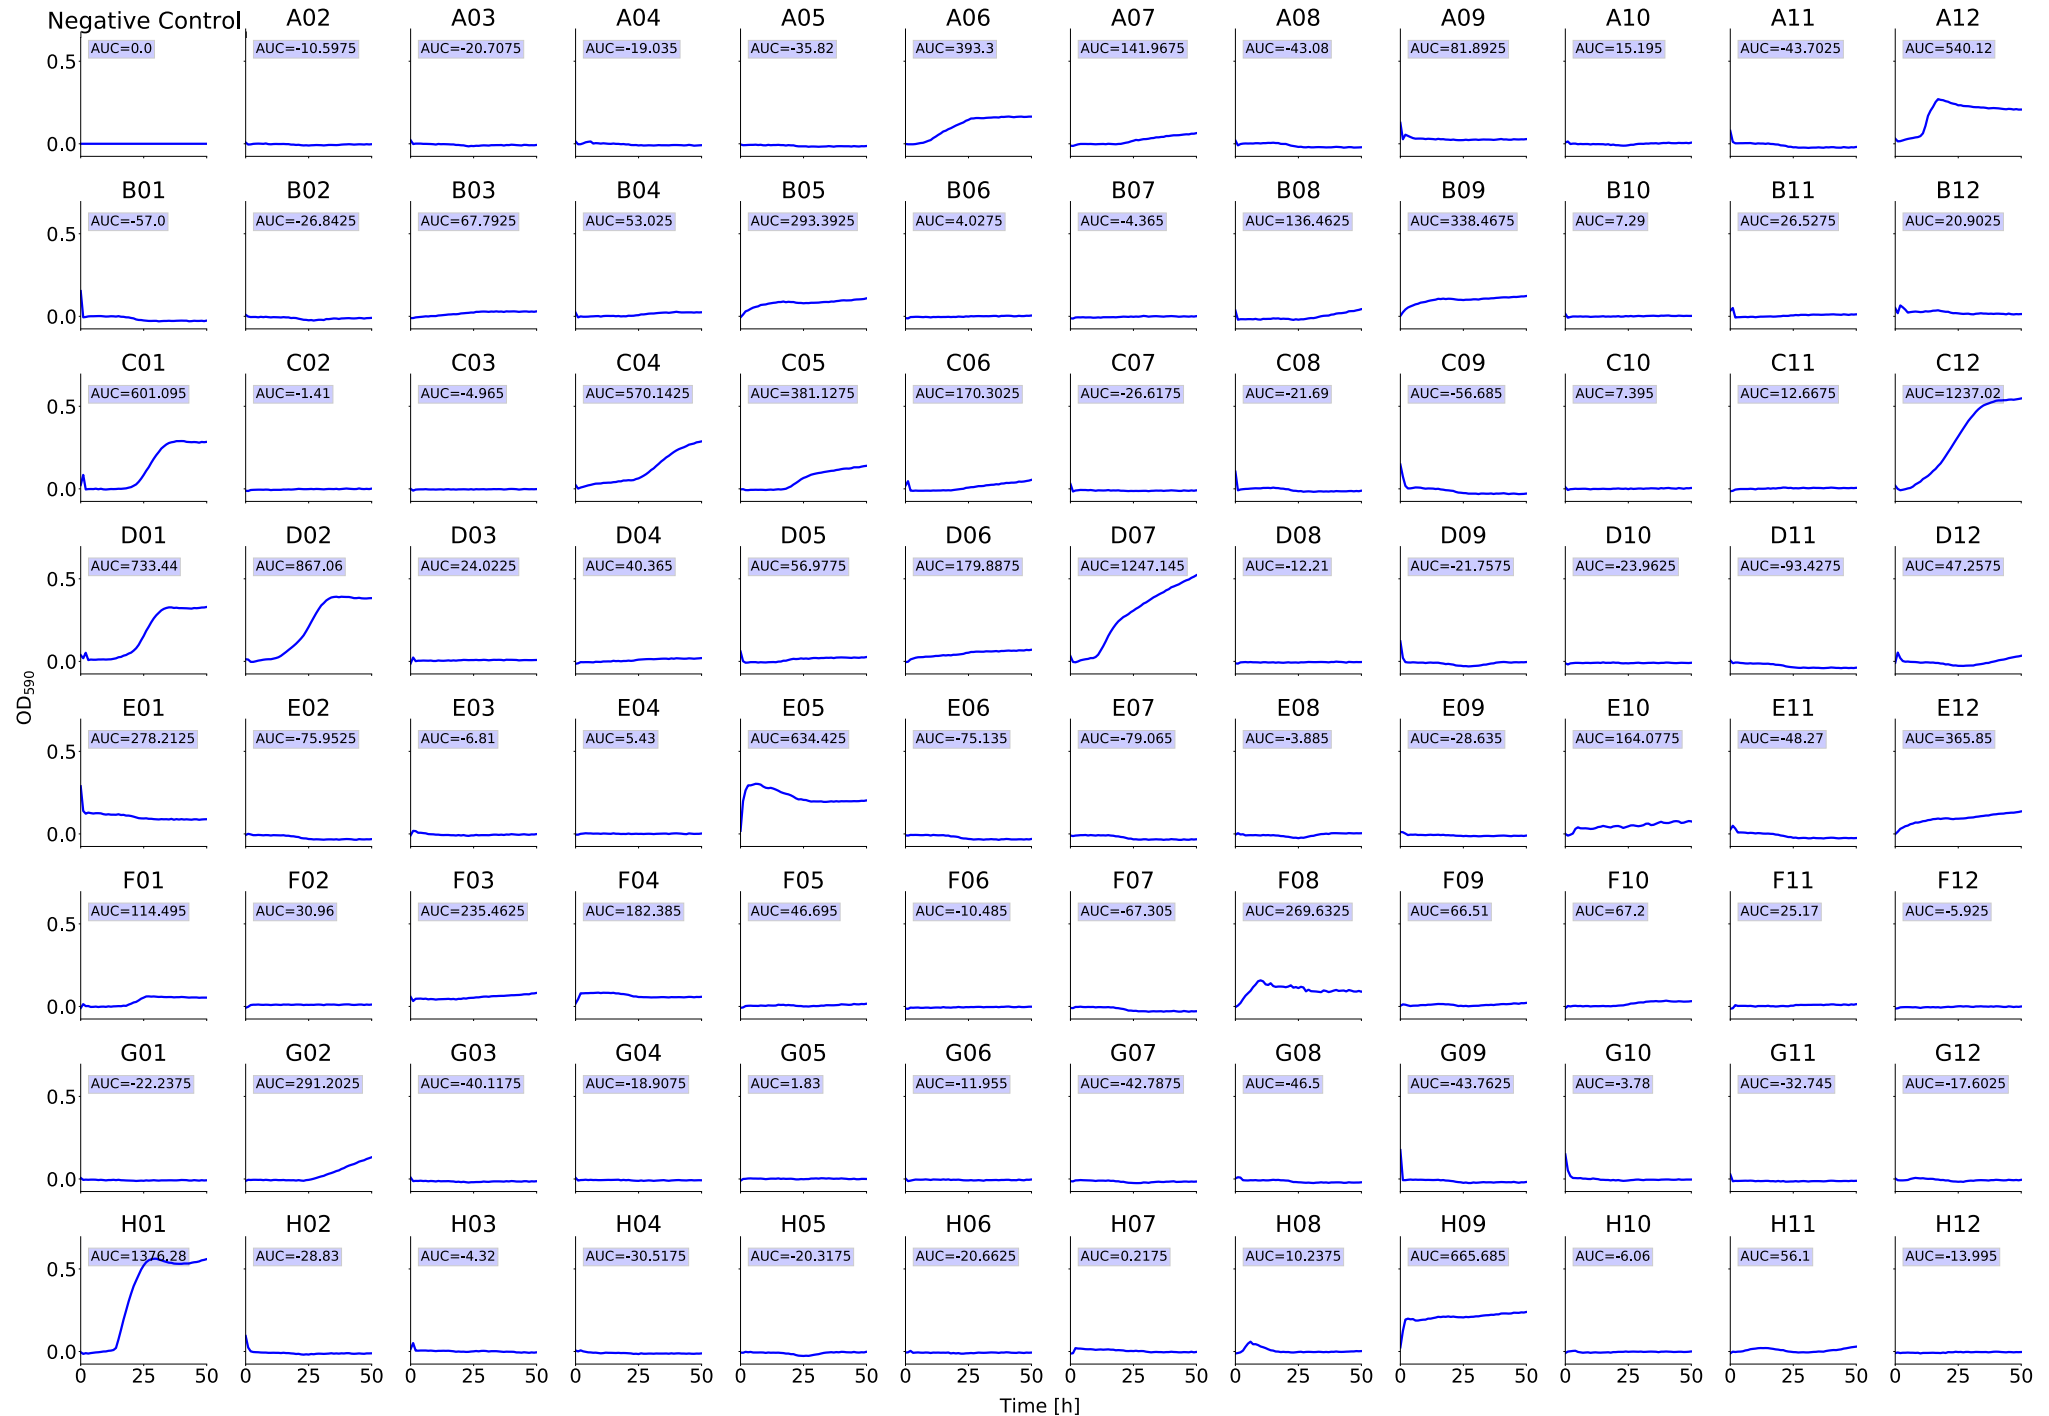

# PM3B

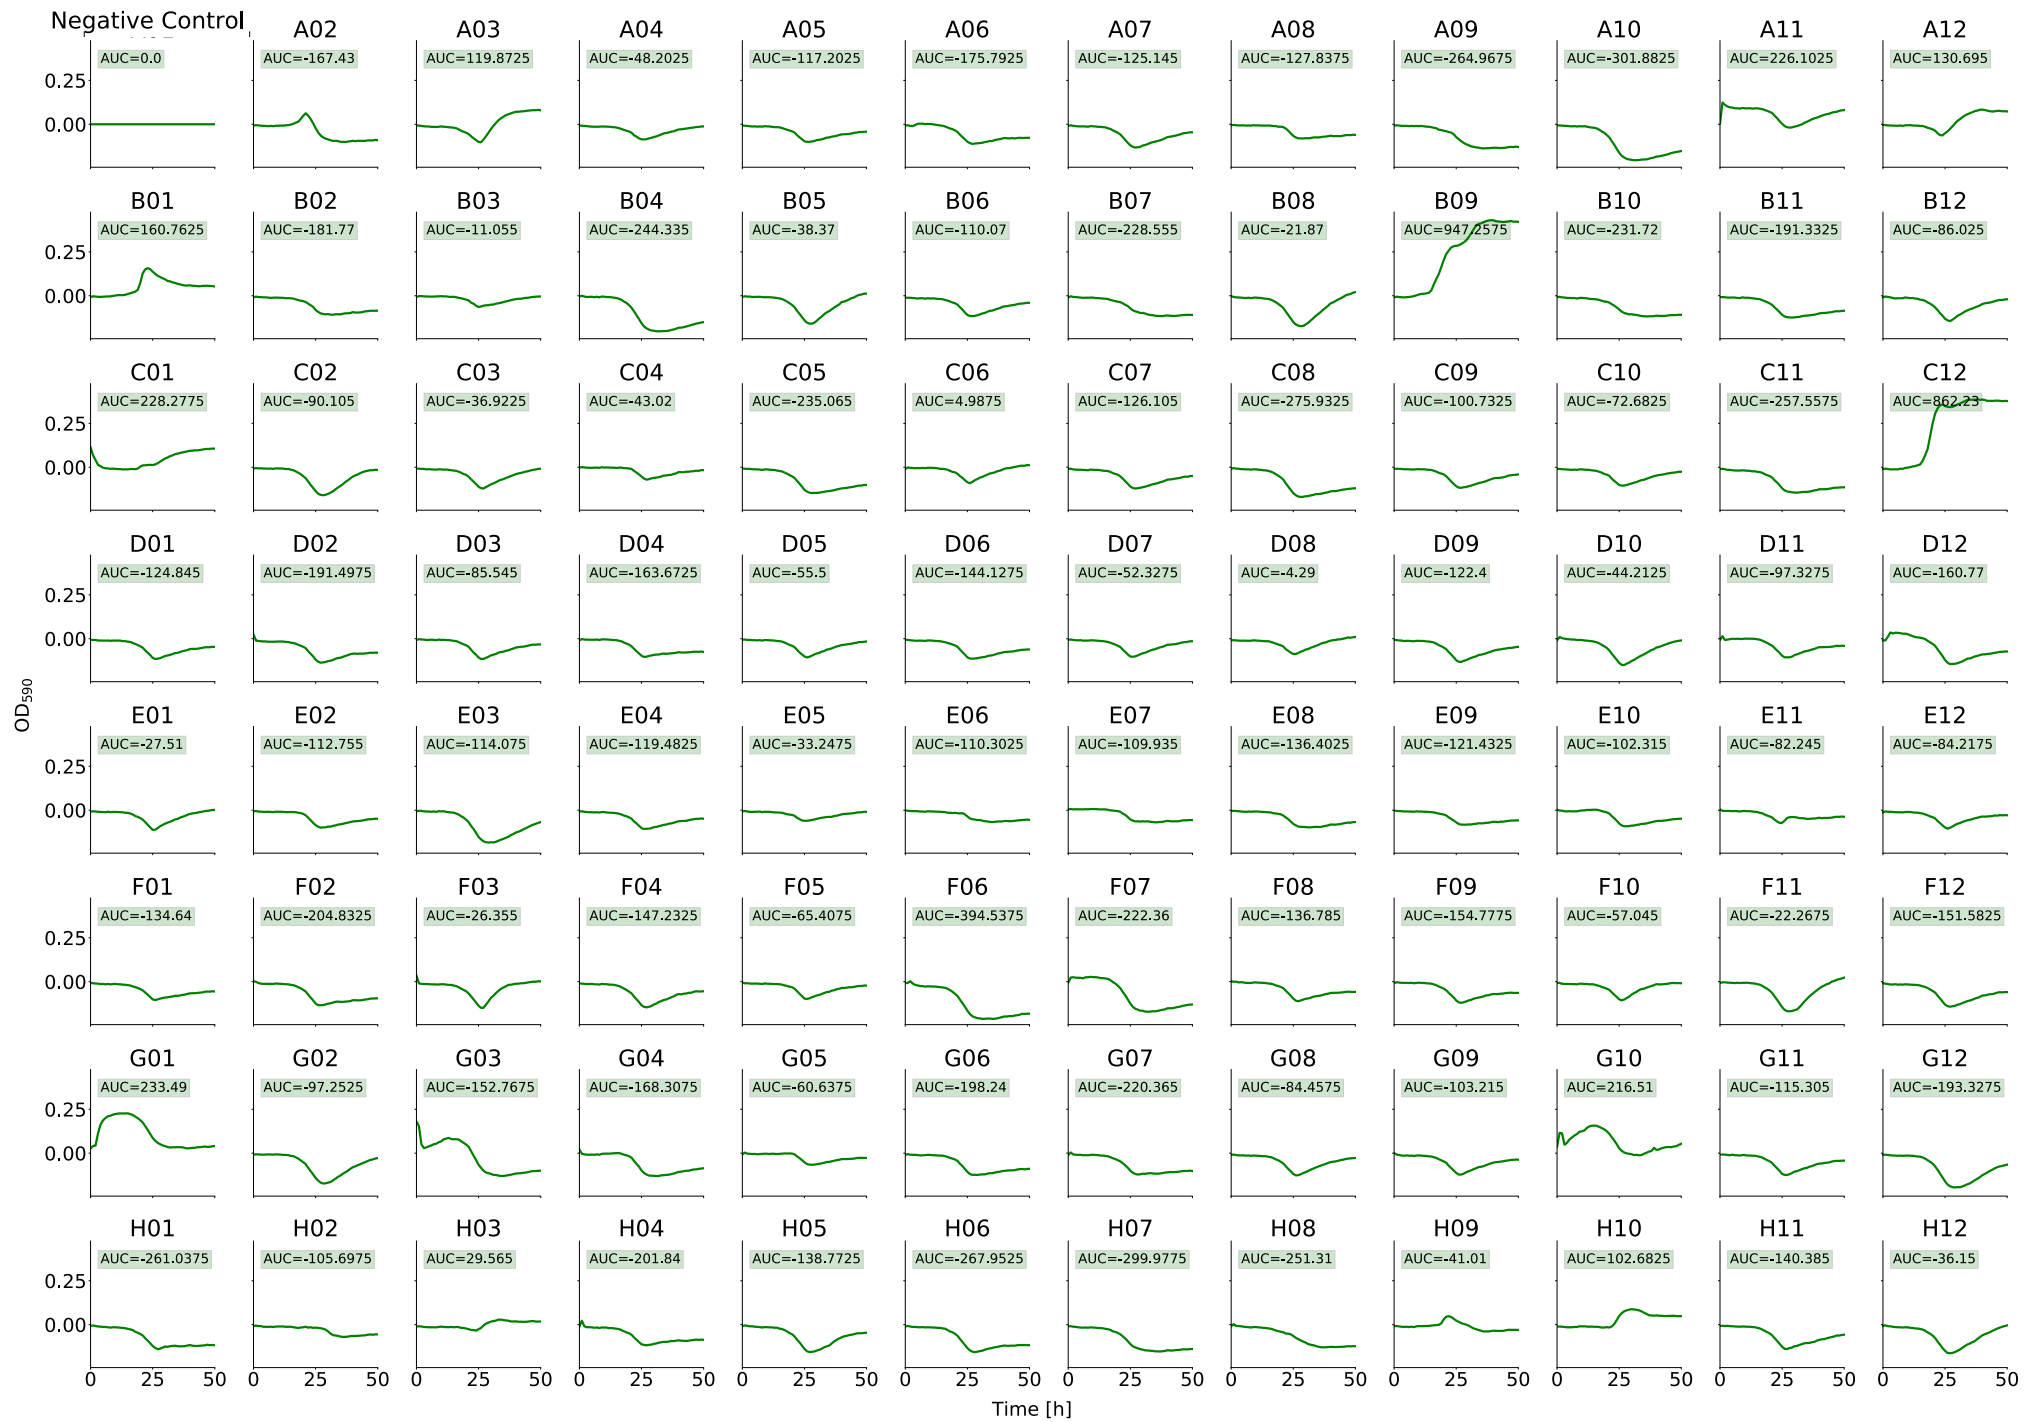

# PM4A

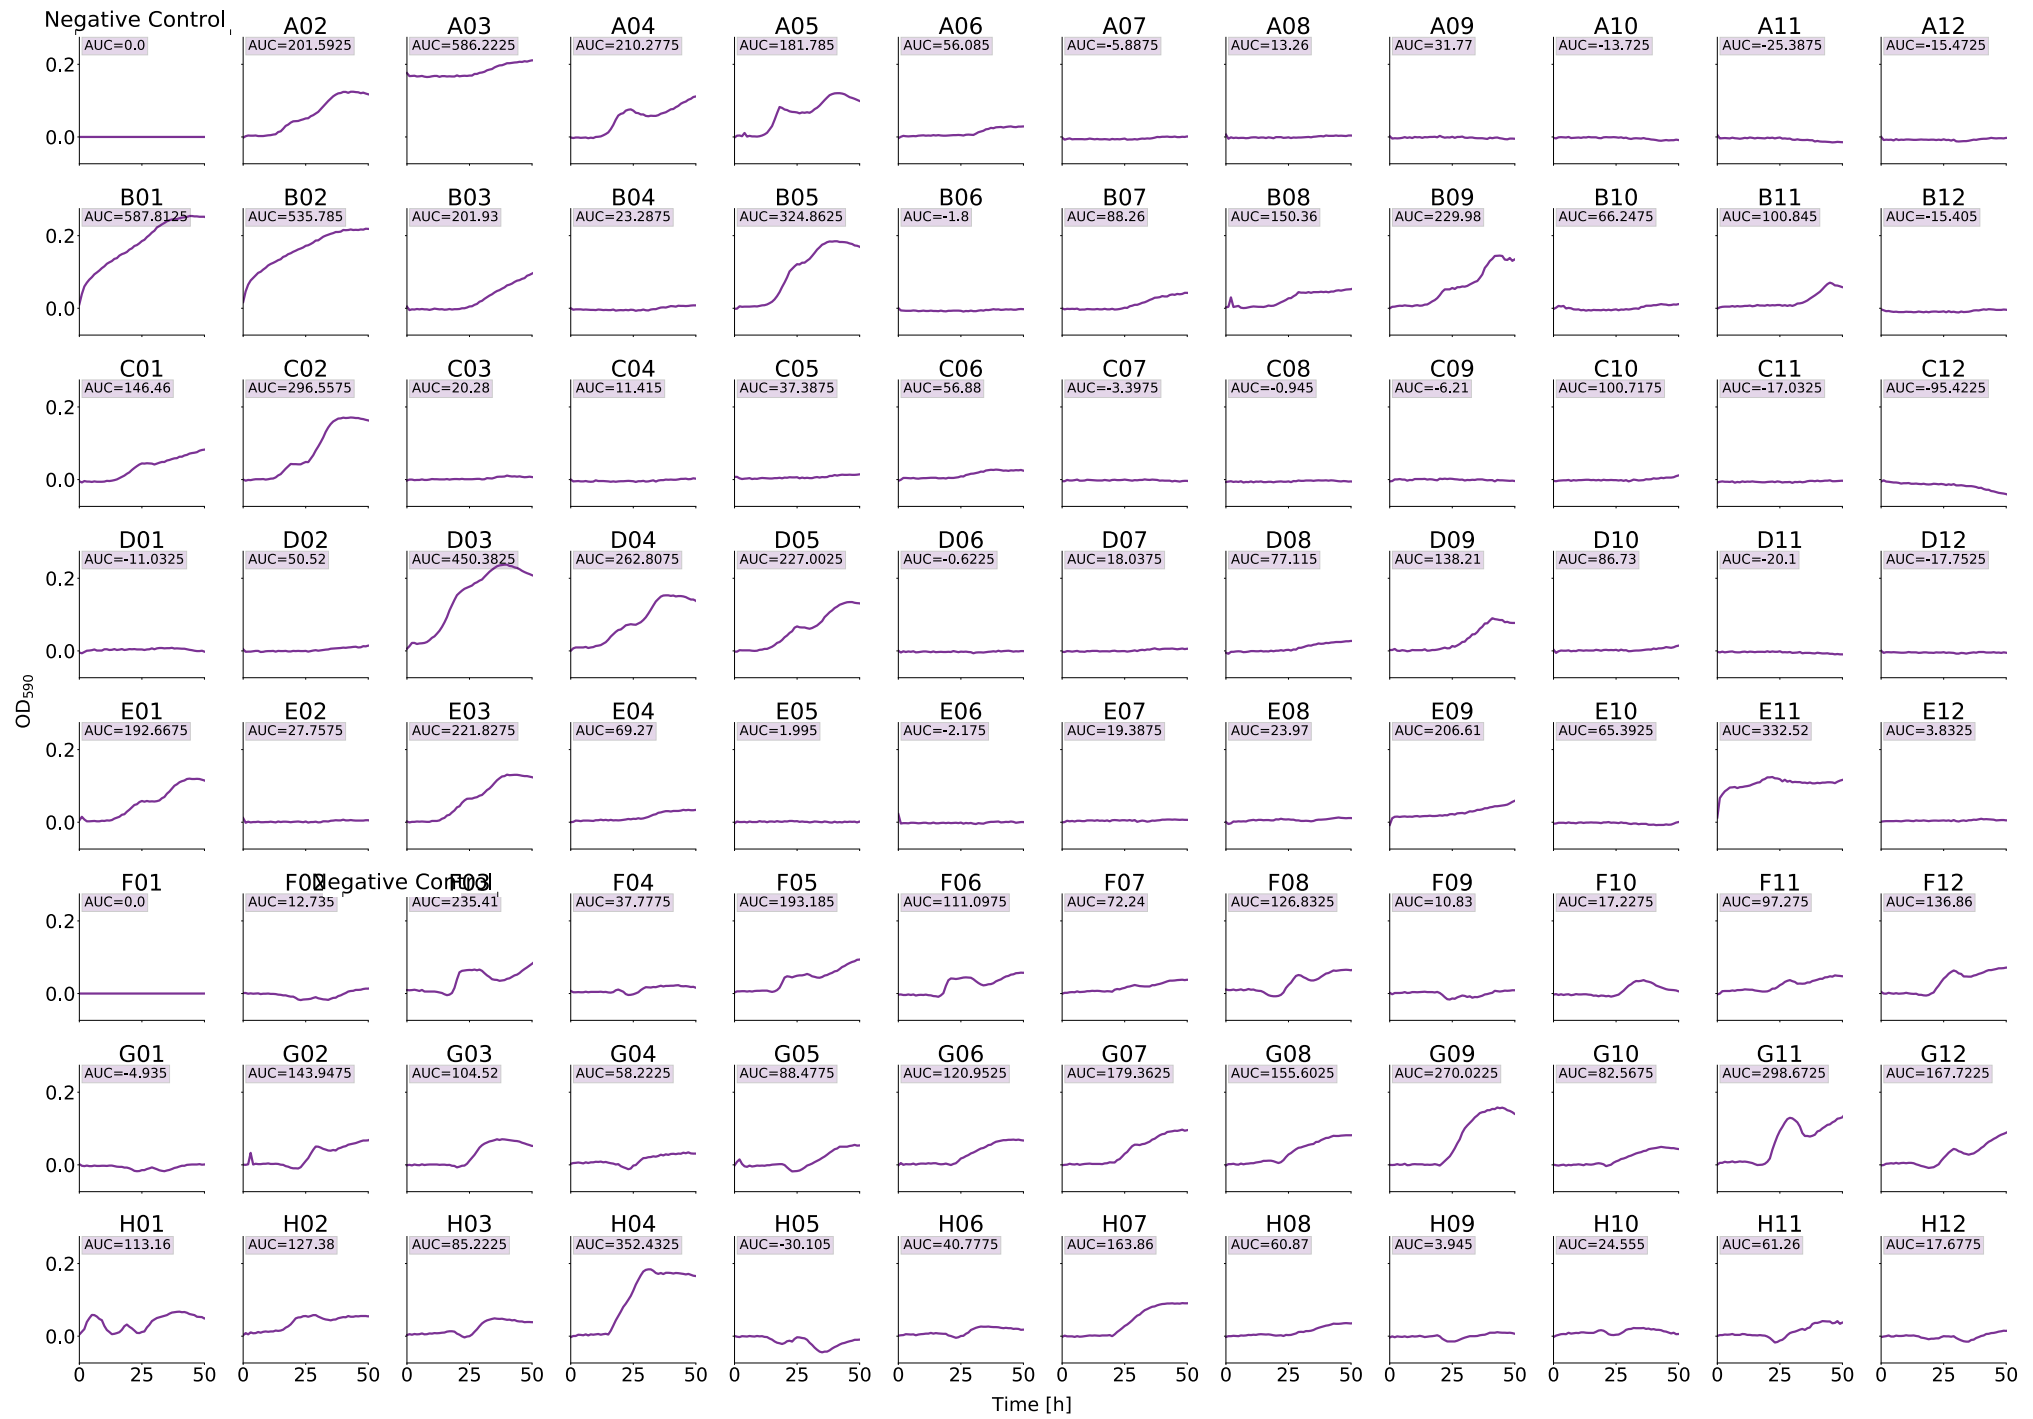

Supplement: spectrum.04006-23-s0001.pdf [file spectrum.04006-23-s0001.pdf]
