# Supplementary material for: Genome-scale model of Rothia mucilaginosa predicts gene essentialities and reveals metabolic capabilities
Source: PubMed Central journal article supplement (PMC11237427; doi:10.1128/spectrum.04006-23), 2024-04-23
Supplement: spectrum.04006-23-s0004.pdf [file spectrum.04006-23-s0004.pdf]

**S4 Figure. Distribution of essential genes in metabolic subsystems.** The classification of *in silico*-predicted essential genes based on annotated Gene Ontology (GO) terms.
